# Supplementary material for: Association between Ready-to-Eat Cereal Consumption and Nutrient Intake, Nutritional Adequacy, and Diet Quality in Adults in the National Health and Nutrition Examination Survey 2015–2016
Source: MDPI journal article supplement (doi:10.3390/nu11122952), 2019-12-04
Supplement: s1 [file s1]

Supplemental Table S1. Number and percentages of ready-to-eat (RTE) cereal eaters and non-eaters in different National Health and Nutrition Examination Survey cycles.

| Years     | 18-54 years       |                       | 55 years or older |                       | 18 years or older |                       |
|-----------|-------------------|-----------------------|-------------------|-----------------------|-------------------|-----------------------|
|           | RTE cereal eaters | RTE cereal non-eaters | RTE cereal eaters | RTE cereal non-eaters | RTE cereal eaters | RTE cereal non-eaters |
| 2003-2004 | 460 (17%)         | 2370 (83%)            | 456 (27%)         | 1418 (73%)            | 916 (20%)         | 3788 (80%)            |
| 2005-2006 | 531 (19%)         | 2502 (81%)            | 446 (29%)         | 1199 (71%)            | 977 (22%)         | 3701 (78%)            |
| 2007-2008 | 564 (18%)         | 2724 (82%)            | 588 (29%)         | 1727 (71%)            | 1152 (22%)        | 4451 (78%)            |
| 2009-2010 | 693 (21%)         | 2962 (79%)            | 571 (28%)         | 1728 (72%)            | 1264 (24%)        | 4690 (76%)            |
| 2011-2012 | 518 (19%)         | 2628 (81%)            | 431 (29%)         | 1429 (71%)            | 949 (22%)         | 4057 (78%)            |
| 2013-2014 | 541 (18%)         | 2738 (82%)            | 415 (24%)         | 1562 (76%)            | 956 (20%)         | 4300 (80%)            |
| 2015-2016 | 449 (16%)         | 2650 (84%)            | 382 (23%)         | 1682 (77%)            | 831 (19%)         | 4332 (81%)            |
| 2003-2016 | 3756 (18%)        | 18574 (82%)           | 3289 (27%)        | 10745 (73%)           | 7045 (21%)        | 29319 (79%)           |

Day-1 24-h dietary recall data were used.

Supplemental Table S2. Unadjusted energy intake and nutrient intake in ready-to-eat (RTE) cereal eaters and non-eaters in US adults, National Health and Nutrition Examination Survey 2015-2016.

|                                    | 18-54 years       |                       |                   | ≥55 years         |                       |                   | ≥18 years         |                       |                   |
|------------------------------------|-------------------|-----------------------|-------------------|-------------------|-----------------------|-------------------|-------------------|-----------------------|-------------------|
|                                    | RTE cereal Eaters | RTE cereal non-eaters | P                 | RTE cereal Eaters | RTE cereal non-eaters | P                 | RTE cereal Eaters | RTE cereal non-eaters | P                 |
| Energy (kcal)                      | 2250.1±46.6       | 2195.5±27.2           | 0.23              | 2002.1±56.7       | 1914.1±30.3           | 0.17              | 2135.1±35.6       | 2095.7±22.7           | 0.29              |
| Total carbohydrate (g)             | 284.5±9.2         | 248.3±2.9             | 0.001             | 256.7±6.8         | 218.1±3.4             | <b>0.0003</b>     | 271.6±6.4         | 237.6±2.3             | <b>&lt;0.0001</b> |
| Total sugars (g)                   | 128.2±5.2         | 104.7±2.2             | <b>0.0005</b>     | 114.6±5.0         | 96.2±2.4              | 0.009             | 121.9±3.7         | 101.7±1.7             | <b>&lt;0.0001</b> |
| Added sugar (tsp. eq.)             | 18.3±1.2          | 16.9±0.5              | 0.23              | 14.4±0.9          | 15.0±0.6              | 0.62              | 16.5±0.8          | 16.3±0.4              | 0.75              |
| Dietary fiber (g)                  | 21.0±0.8          | 16.5±0.5              | <b>&lt;0.0001</b> | 21.5±0.8          | 15.6±0.4              | <b>&lt;0.0001</b> | 21.2±0.5          | 16.2±0.3              | <b>&lt;0.0001</b> |
| Total fat (g)                      | 83.5±2.0          | 87.9±1.5              | 0.01              | 76.5±2.6          | 79.4±1.7              | 0.31              | 80.3±1.3          | 84.9±1.3              | 0.002             |
| Saturated fat (g)                  | 28.0±1.0          | 28.6±0.5              | 0.50              | 25.9±1.1          | 25.8±0.6              | 0.95              | 27.0±0.8          | 27.6±0.5              | 0.39              |
| Protein (g)                        | 85.4±2.4          | 87.1±1.9              | 0.41              | 76.9±3.2          | 74.2±1.5              | 0.48              | 81.4±2.3          | 82.5±1.3              | 0.68              |
| Calcium (mg)                       | 1233.9±41.2       | 948.2±22.2            | <b>&lt;0.0001</b> | 1091.3±33.7       | 802.0±26.5            | <b>&lt;0.0001</b> | 1167.8±26.0       | 896.3±18.9            | <b>&lt;0.0001</b> |
| Iron (mg)                          | 21.3±0.7          | 12.9±0.2              | <b>&lt;0.0001</b> | 20.7±0.5          | 11.4±0.2              | <b>&lt;0.0001</b> | 21.0±0.5          | 12.3±0.1              | <b>&lt;0.0001</b> |
| Magnesium (mg)                     | 348.1±9.9         | 306.7±6.9             | 0.0007            | 331.1±10.6        | 277.2±6.4             | <b>0.0006</b>     | 340.2±6.3         | 296.3±5.9             | <b>&lt;0.0001</b> |
| Potassium (mg)                     | 2905.5±96.8       | 2585.4±48.4           | 0.002             | 2979.4±104.6      | 2473.0±41.9           | <b>0.0001</b>     | 2939.8±76.1       | 2545.6±36.9           | <b>&lt;0.0001</b> |
| Sodium (mg)                        | 3508.6±118.7      | 3779.8±56.1           | 0.03              | 3164.3±112.7      | 3223.3±76.6           | 0.69              | 3348.9±96.1       | 3582.4±49.6           | 0.06              |
| Zinc (mg)                          | 14.6±0.5          | 11.0±0.2              | <b>&lt;0.0001</b> | 13.2±0.5          | 9.7±0.2               | <b>&lt;0.0001</b> | 13.9±0.4          | 10.5±0.2              | <b>&lt;0.0001</b> |
| Vitamin A, RAE (mcg)               | 1020.1±80.1       | 556.4±15.6            | <b>&lt;0.0001</b> | 844.7±62.3        | 541.9±17.0            | <b>0.0007</b>     | 938.7±42.9        | 551.2±12.8            | <b>&lt;0.0001</b> |
| Thiamin (mg)                       | 2.1±0.1           | 1.5±0.0               | <b>&lt;0.0001</b> | 1.9±0.1           | 1.4±0.0               | <b>&lt;0.0001</b> | 2.0±0.0           | 1.5±0.0               | <b>&lt;0.0001</b> |
| Riboflavin (mg)                    | 2.9±0.1           | 2.1±0.0               | <b>&lt;0.0001</b> | 2.6±0.1           | 1.9±0.1               | <b>&lt;0.0001</b> | 2.8±0.1           | 2.0±0.0               | <b>&lt;0.0001</b> |
| Niacin (mg)                        | 31.7±1.0          | 27.4±0.5              | <b>0.0004</b>     | 27.3±0.8          | 21.4±0.7              | <b>&lt;0.0001</b> | 29.7±0.7          | 25.3±0.5              | <b>&lt;0.0001</b> |
| Vitamin B <sub>6</sub> (mg)        | 3.1±0.1           | 2.2±0.1               | <b>&lt;0.0001</b> | 2.6±0.1           | 1.6±0.1               | <b>&lt;0.0001</b> | 2.9±0.1           | 2.0±0.0               | <b>&lt;0.0001</b> |
| Folate, DFE (mcg)                  | 915.9±30.4        | 458.5±12.1            | <b>&lt;0.0001</b> | 773.8±24.2        | 388.9±9.0             | <b>&lt;0.0001</b> | 850.0±21.4        | 433.8±7.9             | <b>&lt;0.0001</b> |
| Vitamin B <sub>12</sub> (mcg)      | 7.9±0.3           | 4.6±0.1               | <b>&lt;0.0001</b> | 7.2±0.9           | 3.8±0.2               | 0.003             | 7.6±0.4           | 4.3±0.1               | <b>&lt;0.0001</b> |
| Vitamin C (mg)                     | 90.0±6.7          | 78.1±3.6              | 0.08              | 98.2±7.3          | 71.2±3.3              | 0.002             | 93.8±4.8          | 75.6±2.5              | <b>0.0007</b>     |
| Vitamin D (mcg)                    | 8.0±0.6           | 4.0±0.2               | <b>&lt;0.0001</b> | 6.9±0.5           | 3.9±0.2               | <b>&lt;0.0001</b> | 7.5±0.4           | 4.0±0.1               | <b>&lt;0.0001</b> |
| Vitamin E as alpha-tocopherol (mg) | 11.2±1.0          | 9.3±0.3               | 0.06              | 9.2±0.4           | 8.2±0.3               | 0.06              | 10.3±0.6          | 8.9±0.2               | 0.02              |

Day-1 24-h dietary recall data were used. P value <0.05/48=0.001 was considered to be statistically significant and shown in bold.

Supplemental Table S3. Adjusted energy intake and nutrient intake in ready-to-eat (RTE) cereal eaters and non-eaters in US adults aged 18 years or older, National Health and Nutrition Examination Survey 2015-2016.

|                                    | RTE cereal Eaters | RTE cereal non-eaters | P                 |
|------------------------------------|-------------------|-----------------------|-------------------|
| Energy (kcal)                      | 2143.5±33.4       | 2054.6±26.7           | 0.02              |
| Total carbohydrate (g)             | 276.0±3.3         | 243.9±1.6             | <b>&lt;0.0001</b> |
| Total sugars (g)                   | 121.8±2.9         | 102.0±2.2             | <b>&lt;0.0001</b> |
| Added sugar (tsp. eq.)             | 16.4±0.7          | 15.8±0.6              | 0.22              |
| Dietary fiber (g)                  | 21.1±0.7          | 16.8±0.4              | <b>&lt;0.0001</b> |
| Total fat (g)                      | 70.4±1.6          | 78.4±0.6              | <b>&lt;0.0001</b> |
| Saturated fat (g)                  | 23.8±0.6          | 25.5±0.3              | 0.01              |
| Protein (g)                        | 79.6±2.1          | 82.1±0.8              | 0.15              |
| Calcium (mg)                       | 1143.2±24.3       | 895.6±12.2            | <b>&lt;0.0001</b> |
| Iron (mg)                          | 20.7±0.5          | 12.3±0.1              | <b>&lt;0.0001</b> |
| Magnesium (mg)                     | 387.4±6.7         | 352.9±4.3             | <b>0.0006</b>     |
| Potassium (mg)                     | 2979.9±62.3       | 2680.8±25.0           | <b>0.0001</b>     |
| Sodium (mg)                        | 3201.7±59.1       | 3494.9±35.6           | <b>0.0006</b>     |
| Zinc (mg)                          | 13.5±0.3          | 10.3±0.1              | <b>&lt;0.0001</b> |
| Vitamin A, RAE (mcg)               | 900.1±53.6        | 538.8±19.8            | <b>&lt;0.0001</b> |
| Thiamin (mg)                       | 1.9±0.1           | 1.4±0.0               | <b>&lt;0.0001</b> |
| Riboflavin (mg)                    | 2.9±0.1           | 2.2±0.0               | <b>&lt;0.0001</b> |
| Niacin (mg)                        | 34.5±0.6          | 29.9±0.6              | <b>&lt;0.0001</b> |
| Vitamin B <sub>6</sub> (mg)        | 3.1±0.1           | 2.2±0.0               | <b>&lt;0.0001</b> |
| Folate, DFE (mcg)                  | 899.7±23.0        | 486.3±5.9             | <b>&lt;0.0001</b> |
| Vitamin B <sub>12</sub> (mcg)      | 7.7±0.4           | 4.5±0.2               | <b>&lt;0.0001</b> |
| Vitamin C (mg)                     | 104.5±4.4         | 89.4±2.5              | 0.004             |
| Vitamin D (mcg)                    | 7.7±0.4           | 4.3±0.2               | <b>&lt;0.0001</b> |
| Vitamin E as alpha-tocopherol (mg) | 9.4±0.6           | 8.5±0.2               | 0.13              |

Day-1 24-h dietary recall data were used. Covariates included age, gender, race/ethnicity, ratio of family income to poverty, education level, and smoking status. Energy intake was also included as another covariate in the analysis of nutrients. P value <0.05/24=0.002 was considered to be statistically significant and shown in bold.

Supplemental Table S4. Adjusted energy intake and nutrient intake by frequency of Ready-to-eat (RTE) cereal consumption in US adults aged 18 years or older, National Health and Nutrition Examination Survey 2015-2016.

|                        | Non-eaters<br>(n=3212)   | RTE cereal<br>consumption in<br>one day (n=744) | RTE cereal<br>consumption in two<br>days (n=362) | P                 |
|------------------------|--------------------------|-------------------------------------------------|--------------------------------------------------|-------------------|
| Energy (kcal)          | 1994.1±19.4 <sup>a</sup> | 2145.8±46.3 <sup>a</sup>                        | 2061.3±39.7 <sup>a</sup>                         | 0.01              |
| Total carbohydrate (g) | 229.8±1.8 <sup>a</sup>   | 244.6±3.4 <sup>b</sup>                          | 260.1±3.1 <sup>c</sup>                           | <b>&lt;0.0001</b> |
| Total sugars (g)       | 95.1±1.3 <sup>a</sup>    | 98.5±3.1 <sup>a</sup>                           | 113.6±2.9 <sup>b</sup>                           | <b>0.0001</b>     |
| Added sugar (tsp. eq.) | 14.5±0.3 <sup>a</sup>    | 13.4±0.7 <sup>a</sup>                           | 14.2±0.5 <sup>a</sup>                            | 0.39              |
| Dietary fiber (g)      | 16.5±0.2 <sup>a</sup>    | 19.1±0.6 <sup>b</sup>                           | 21.3±0.3 <sup>c</sup>                            | <b>&lt;0.0001</b> |
| Total fat (g)          | 79.1±0.5 <sup>a</sup>    | 75.3±1.1 <sup>a,b</sup>                         | 70.5±1.1 <sup>b</sup>                            | <b>&lt;0.0001</b> |
| Saturated fat (g)      | 25.1±0.2 <sup>a</sup>    | 24.1±0.6 <sup>a,b</sup>                         | 23.1±0.3 <sup>b</sup>                            | <b>0.0005</b>     |
| Protein (g)            | 80.4±0.7 <sup>a</sup>    | 77.2±1.2 <sup>a</sup>                           | 81.5±1.8 <sup>a</sup>                            | 0.06              |
| Calcium (mg)           | 831.4±7.1 <sup>a</sup>   | 969.7±21.1 <sup>b</sup>                         | 1120.9±29.2 <sup>c</sup>                         | <b>&lt;0.0001</b> |
| Iron (mg)              | 12.0±0.1 <sup>a</sup>    | 16.7±0.4 <sup>b</sup>                           | 21.7±0.4 <sup>c</sup>                            | <b>&lt;0.0001</b> |
| Magnesium (mg)         | 287.1±3.8 <sup>a</sup>   | 311.5±9.0 <sup>a,b</sup>                        | 329.9±7.6 <sup>b</sup>                           | <b>0.0001</b>     |
| Potassium (mg)         | 2489.3±20.3 <sup>a</sup> | 2590.1±51.6 <sup>a</sup>                        | 2841.6±38.9 <sup>b</sup>                         | <b>&lt;0.0001</b> |
| Sodium (mg)            | 3432.6±25.3 <sup>a</sup> | 3231.8±57.9 <sup>a</sup>                        | 3157.3±83.7 <sup>a</sup>                         | 0.003             |
| Zinc (mg)              | 10.2±0.1 <sup>a</sup>    | 11.1±0.2 <sup>b</sup>                           | 14.2±0.4 <sup>c</sup>                            | <b>&lt;0.0001</b> |
| Vitamin A, RAE (mcg)   | 539.5±14.1 <sup>a</sup>  | 674.5±34.2 <sup>b</sup>                         | 823.4±23.4 <sup>c</sup>                          | <b>&lt;0.0001</b> |

|                                    |                        |                         |                         |                   |
|------------------------------------|------------------------|-------------------------|-------------------------|-------------------|
| Thiamin (mg)                       | 1.4±0.0 <sup>a</sup>   | 1.6±0.0 <sup>b</sup>    | 2.0±0.1 <sup>c</sup>    | <b>&lt;0.0001</b> |
| Riboflavin (mg)                    | 1.9±0.1 <sup>a</sup>   | 2.2±0.1 <sup>b</sup>    | 2.6±0.1 <sup>c</sup>    | <b>&lt;0.0001</b> |
| Niacin (mg)                        | 24.1±0.4 <sup>a</sup>  | 25.8±0.6 <sup>a</sup>   | 30.1±0.8 <sup>b</sup>   | <b>&lt;0.0001</b> |
| Vitamin B <sub>6</sub> (mg)        | 1.9±0.0 <sup>a</sup>   | 2.2±0.1 <sup>b</sup>    | 2.8±0.1 <sup>c</sup>    | <b>&lt;0.0001</b> |
| Folate, DFE (mcg)                  | 420.0±6.1 <sup>a</sup> | 629.6±14.9 <sup>b</sup> | 872.9±23.4 <sup>c</sup> | <b>&lt;0.0001</b> |
| Vitamin B <sub>12</sub> (mcg)      | 4.2±0.2 <sup>a</sup>   | 5.2±0.2 <sup>b</sup>    | 7.7±0.4 <sup>c</sup>    | <b>&lt;0.0001</b> |
| Vitamin C (mg)                     | 80.9±2.5 <sup>a</sup>  | 83.8±5.7 <sup>a</sup>   | 89.8±3.6 <sup>a</sup>   | 0.11              |
| Vitamin D (mcg)                    | 4.0±0.1 <sup>a</sup>   | 5.6±0.2 <sup>b</sup>    | 7.9±0.4 <sup>c</sup>    | <b>&lt;0.0001</b> |
| Vitamin E as alpha-tocopherol (mg) | 8.3±0.2 <sup>a</sup>   | 9.0±0.6 <sup>a</sup>    | 9.1±0.6 <sup>a</sup>    | 0.22              |

Two-day 24-h dietary recall data were used. Covariates included age, gender, race/ethnicity, ratio of family income to poverty. Energy intake was also included as another covariate in the analysis of nutrients. P value <0.05/(24\*3)=0.0007 was considered to be statistically significant and shown in bold. Different letters in the same row indicate significant differences between groups.

Supplemental Table S5. Contribution of ready-to-eat cereal and co-consumed milk to daily intake of energy and nutrients in ready-to-eat cereal and milk eaters, National Health and Nutrition Examination Survey 2015-2016.

|                         | 18-54 years | 55 years or older | 18 years or older |
|-------------------------|-------------|-------------------|-------------------|
| Energy                  | 14%         | 13%               | 14%               |
| Carbohydrate            | 20%         | 19%               | 20%               |
| Total sugar             | 20%         | 17%               | 19%               |
| Added sugar             | 18%         | 15%               | 17%               |
| Dietary fiber           | 21%         | 24%               | 22%               |
| Total fat               | 8%          | 7%                | 7%                |
| Saturated fat           | 10%         | 8%                | 9%                |
| Protein                 | 13%         | 12%               | 13%               |
| Calcium                 | 25%         | 24%               | 25%               |
| Iron                    | 49%         | 51%               | 50%               |
| Magnesium               | 19%         | 19%               | 19%               |
| Potassium               | 16%         | 14%               | 15%               |
| Sodium                  | 9%          | 9%                | 9%                |
| Zinc                    | 36%         | 34%               | 35%               |
| Vitamin A               | 38%         | 36%               | 37%               |
| Thiamin                 | 37%         | 34%               | 36%               |
| Riboflavin              | 37%         | 32%               | 35%               |
| Niacin                  | 30%         | 30%               | 30%               |
| Vitamin B <sub>6</sub>  | 44%         | 41%               | 43%               |
| Folate                  | 56%         | 54%               | 55%               |
| Vitamin B <sub>12</sub> | 53%         | 47%               | 50%               |
| Vitamin C               | 11%         | 9%                | 10%               |
| Vitamin D               | 51%         | 47%               | 50%               |
| Vitamin E               | 21%         | 21%               | 21%               |

Day-1 24-h dietary recall data were used.

Supplemental Table S6. General health status and selected health conditions in ready-to-eat (RTE) cereal eaters and non-eaters in US adults aged 18 years or older, National Health and Nutrition Examination Survey 2015-2016.

|                                    | RTE cereal eaters <sup>1</sup> | RTE cereal non-eaters | P <sup>2</sup> |
|------------------------------------|--------------------------------|-----------------------|----------------|
| General Health Status <sup>3</sup> |                                |                       | <b>0.037</b>   |
| Good or excellent                  | 628 (83%)                      | 3035 (78%)            |                |
| Fair                               | 133 (12%)                      | 942 (16%)             |                |
| Poor                               | 27 (2%)                        | 146 (2%)              |                |
| Missing                            | 43 (3%)                        | 209 (4%)              |                |
| Overweight/Obese <sup>4</sup>      |                                |                       | <b>0.030</b>   |

|                           |           |            |       |
|---------------------------|-----------|------------|-------|
| Yes                       | 567 (68%) | 3107 (72%) |       |
| No                        | 264 (32%) | 1225 (28%) |       |
| Diabetes <sup>5</sup>     |           |            | 0.575 |
| Yes                       | 120 (13%) | 627 (11%)  |       |
| No                        | 691 (85%) | 3611 (87%) |       |
| Borderline                | 20 (2%)   | 94 (2%)    |       |
| Hypertension <sup>6</sup> |           |            | 0.213 |
| Yes                       | 297 (34%) | 1551 (31%) |       |
| No                        | 533 (66%) | 2777 (69%) |       |
| Don't know                | 1 (0%)    | 4 (0%)     |       |

<sup>1</sup>RTE cereal eaters were defined if they reported RTE cereal consumption in day 1 dietary recall data.

<sup>2</sup>P value from survey Chi-square test. <sup>3</sup>Based on responses to the question "would you say your health in general is..." in the Hospital Utilization & Access to Care Questionnaire. <sup>4</sup>Overweight/Obese is defined as body mass index  $\geq 25$  kg/m<sup>2</sup>. <sup>5</sup>Based on responses to the question "have you ever been told by a doctor or other health professional that you have diabetes or sugar diabetes" in the Diabetes Questionnaire. <sup>6</sup>Based on responses to the question "have you ever been told by a doctor or other health professional that you have hypertension or high blood pressure" in the Blood Pressure & Cholesterol Questionnaire.
